# Supplementary material for: In situelectrochemical activation as a generic strategy for promoting the electrocatalytic hydrogen evolution reaction and alcohol electro-oxidation in alkaline medium
Source: Royal Society of Chemistry journal article supplement (doi:10.1039/d0ra07817d), 2021-01-01
Supplement: d0ra07817d1.pdf [file d0ra07817d1.pdf]

# In-situ electrochemical activation as a generic strategy for promoting electrocatalytic hydrogen evolution reaction and alcohol electro-oxidation in alkaline medium

Alireza Kardan <sup>a</sup>, Narges Ashraf <sup>b</sup>, Zeynab Dabirifar <sup>a</sup> and Sara Khadempir<sup>\*a</sup>

<sup>a</sup>Department of Chemical Engineering, Quchan University of Technology, Quchan, Iran.

<sup>b</sup> Department of Chemistry, Faculty of Sciences, Ferdowsi University of Mashhad, Mashhad, Iran.

*\*Corresponding Author: [s.khadempir@qiet.ac.ir](mailto:s.khadempir@qiet.ac.ir) (Sara. Khadempir)*

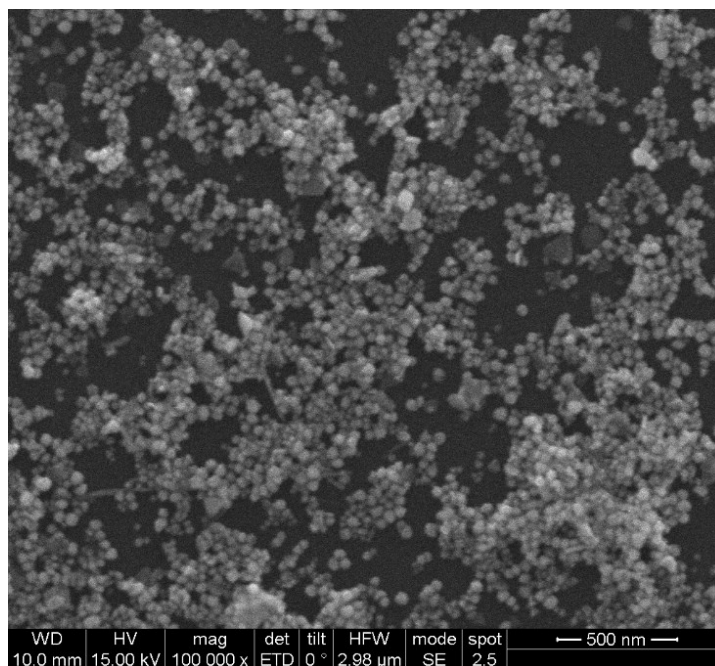

**Fig. S1:** SEM image of AuPd NPs.

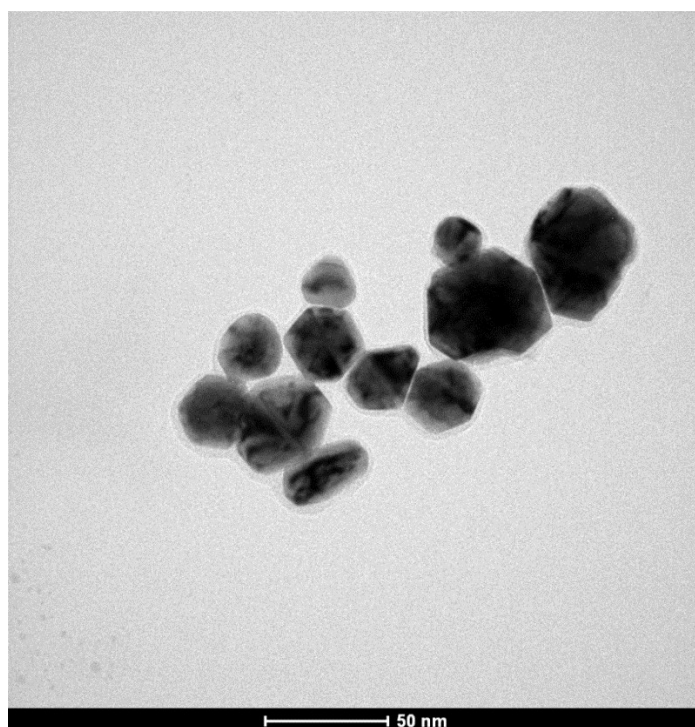

**Fig. S2:** TEM image of AuPd NPs.

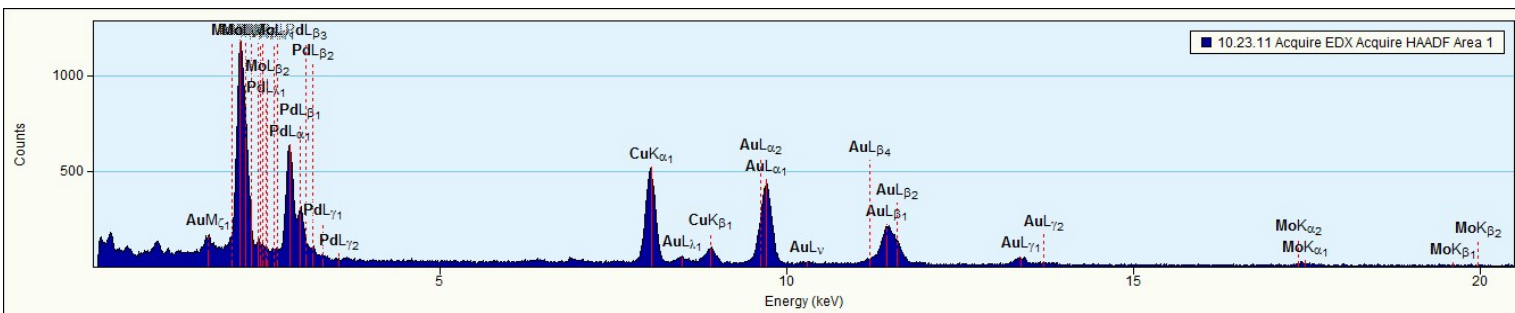

**Fig. S3:** EDS spectra of AuPd NPs.

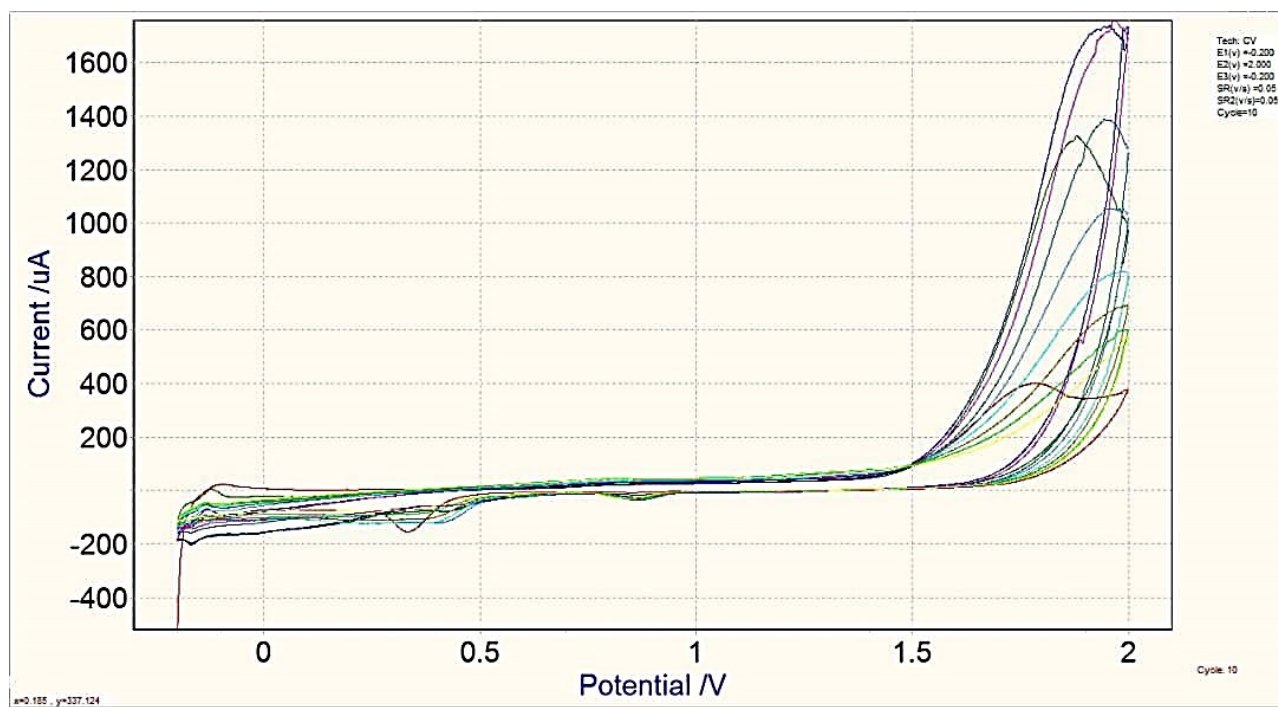

**Fig. S4:** Cyclic voltammograms (CVs) of AuPd NPs in 0.5 M H<sub>2</sub>SO<sub>4</sub> from scan 10 onwards. (Scan rate 50 mV s<sup>-1</sup>)

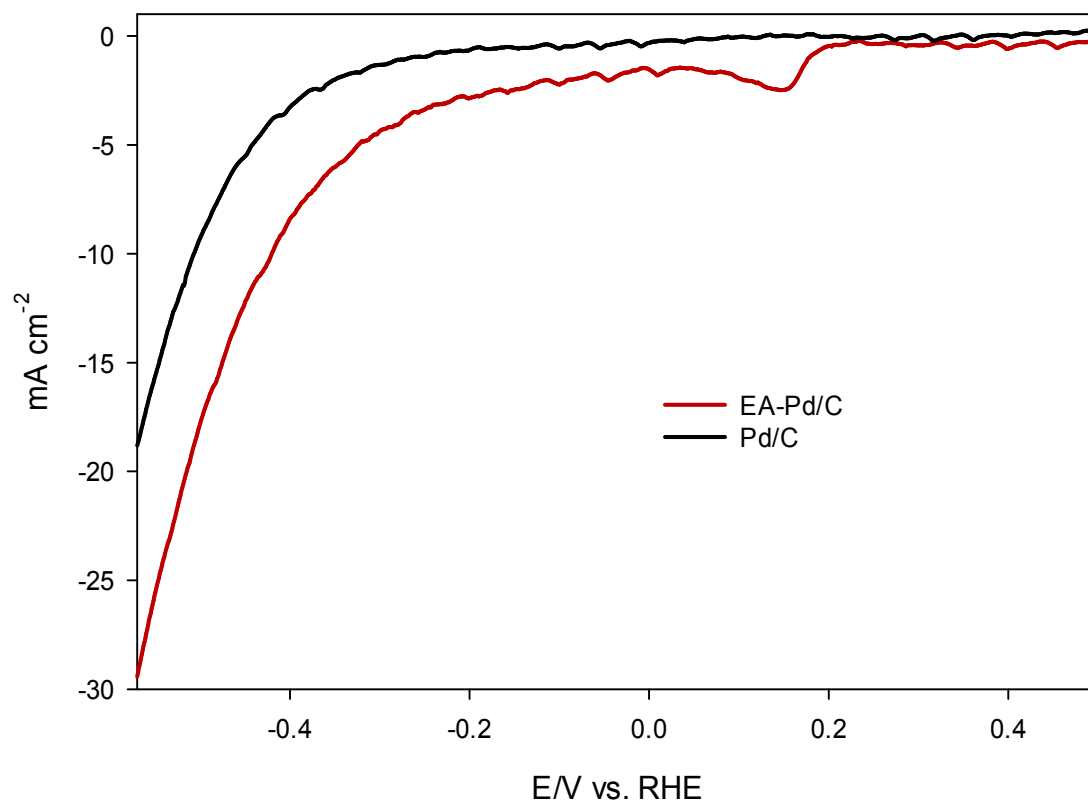

**Fig. S5:** LSV polarization curves for the HER in 1 M NaOH on Pd/C and EA-Pd/C electrocatalysts.

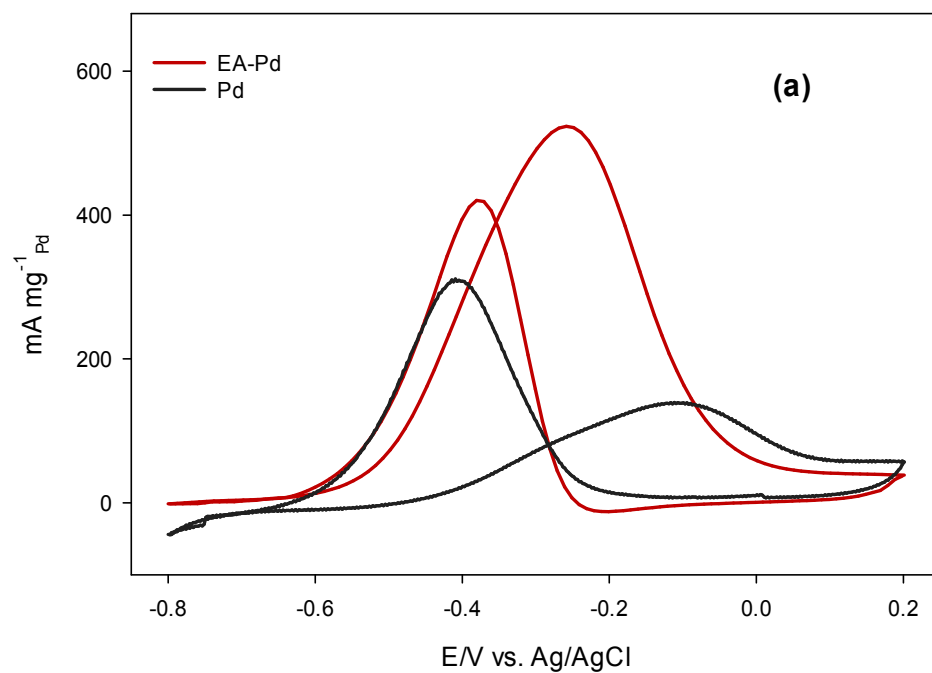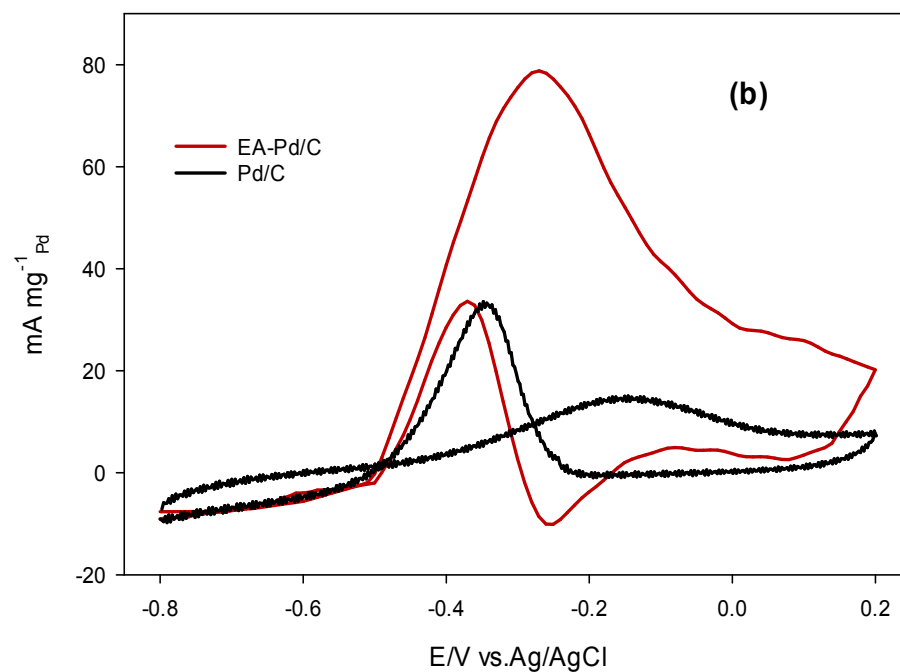

**Fig. S6:** Voltammetric profile of (a) Pd and EA-Pd, (b) Pd/C and EA-Pd/C. All experiments were conducted in a 1 M aqueous solution of ethanol using 1 M NaOH as the supporting electrolyte at a scan rate of 50  $\text{mV s}^{-1}$ .

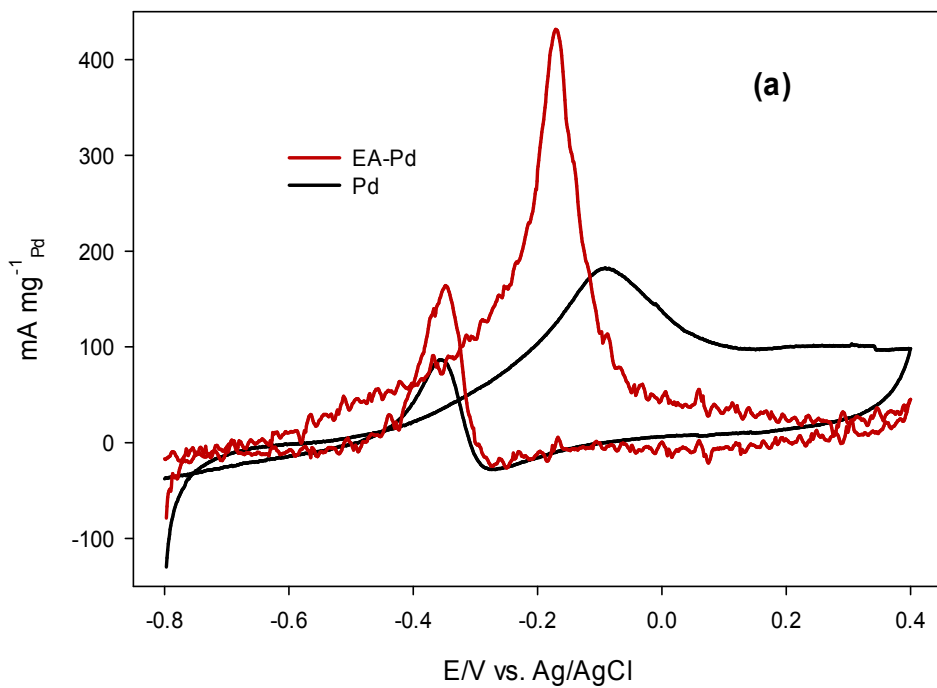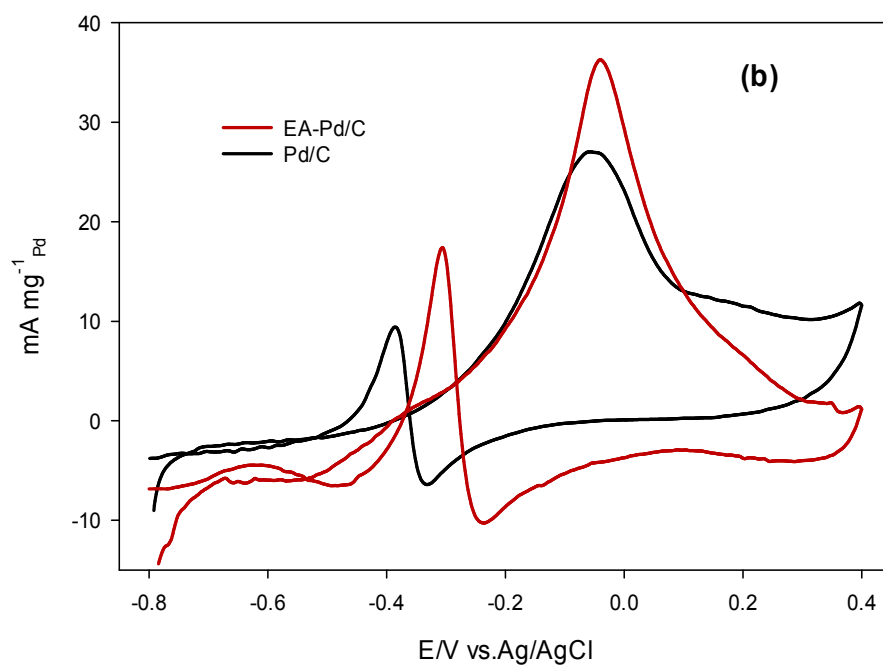

**Fig. S7:** Voltammetric profile of (a) Pd and EA-Pd, (b) Pd/C and EA-Pd/C. All experiments were conducted in a 1 M aqueous solution of methanol using 1 M NaOH as the supporting electrolyte at a scan rate of 50  $\text{mV s}^{-1}$ .

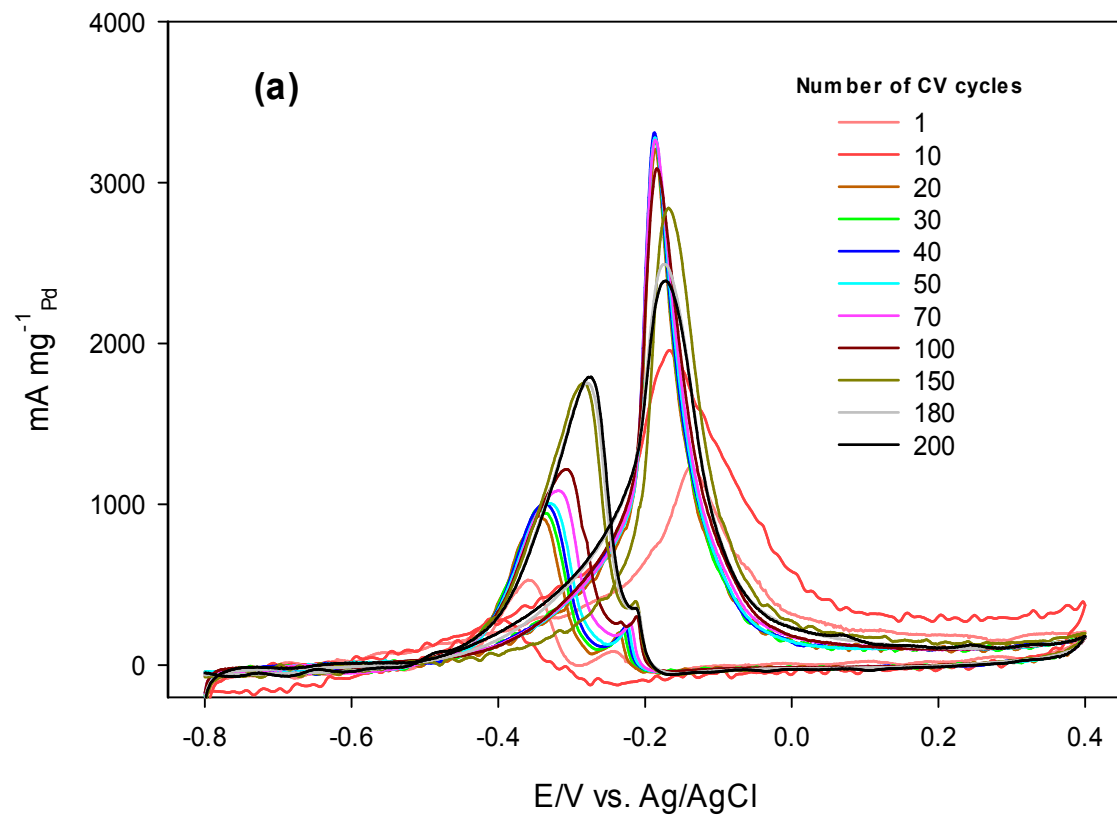

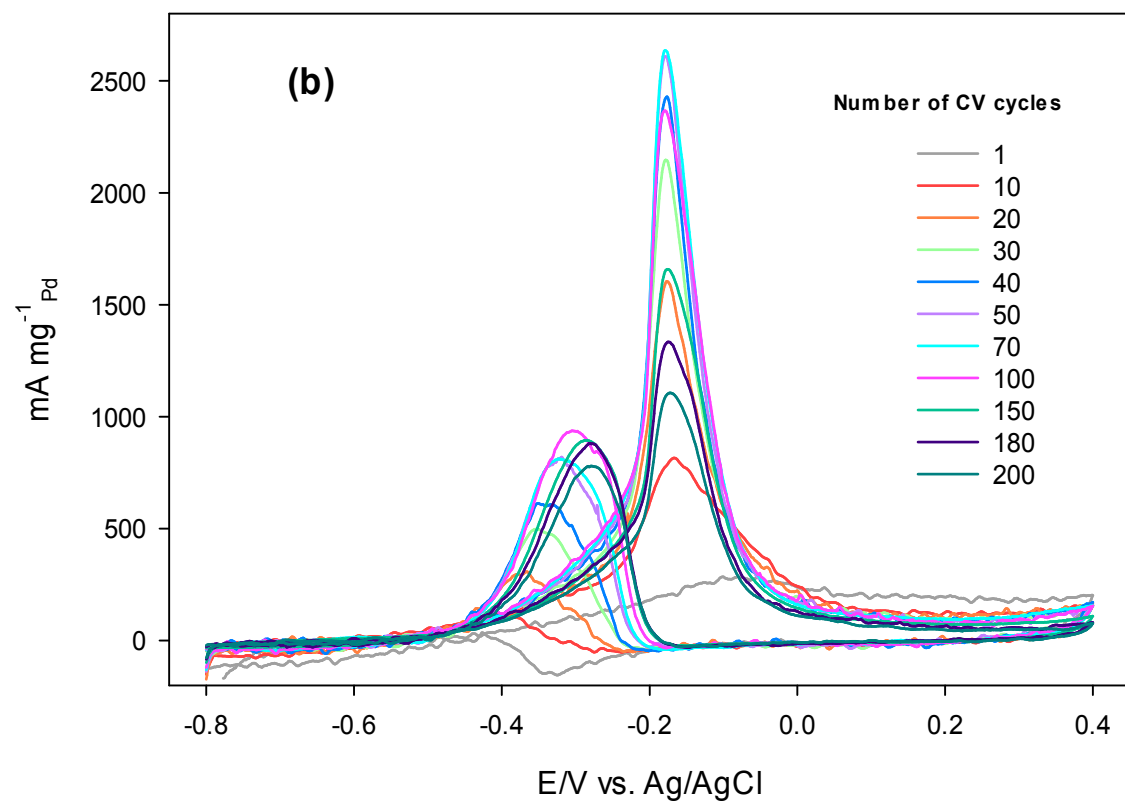

**Fig. S8:** Two hundred consecutive CV curves measured in 1M methanol and 1 M NaOH at (a) EA-AuPd, (b) AuPd.



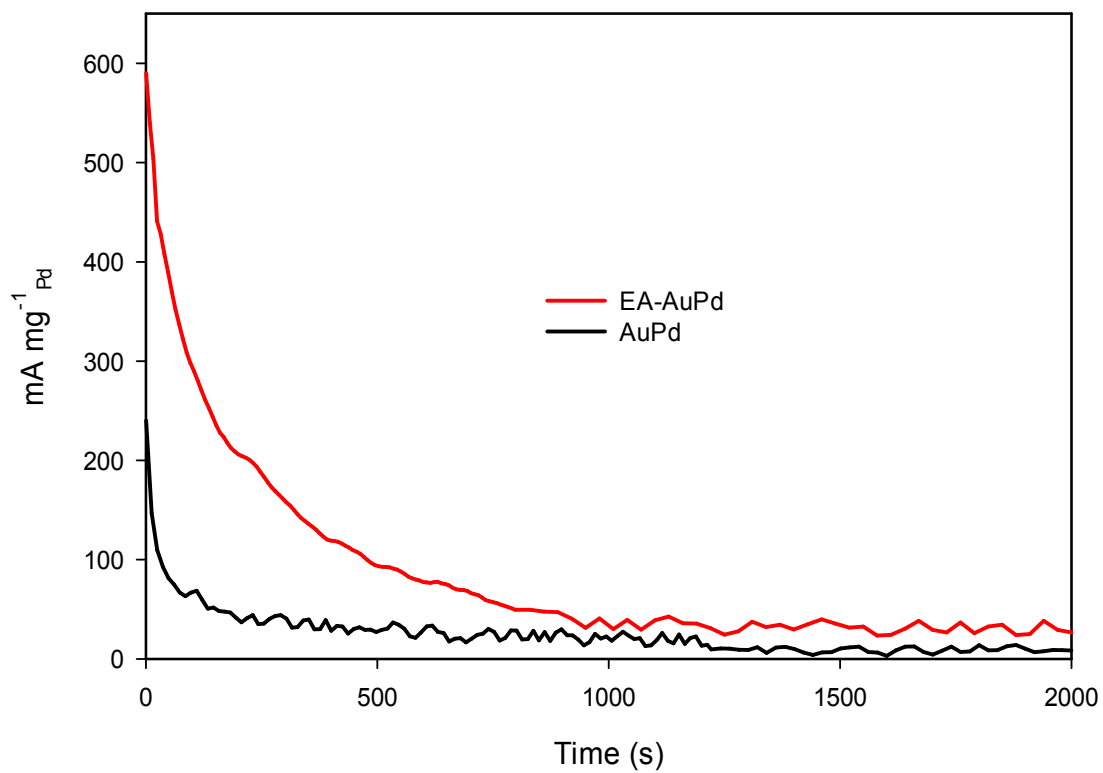

**Fig. S9:** Chronoamperometry curves of EA-AuPd and AuPd catalysts for the EOR measured at -0.3 V (vs. Ag/AgCl). All experiments were conducted in 1 M ethanol + 1 M NaOH.

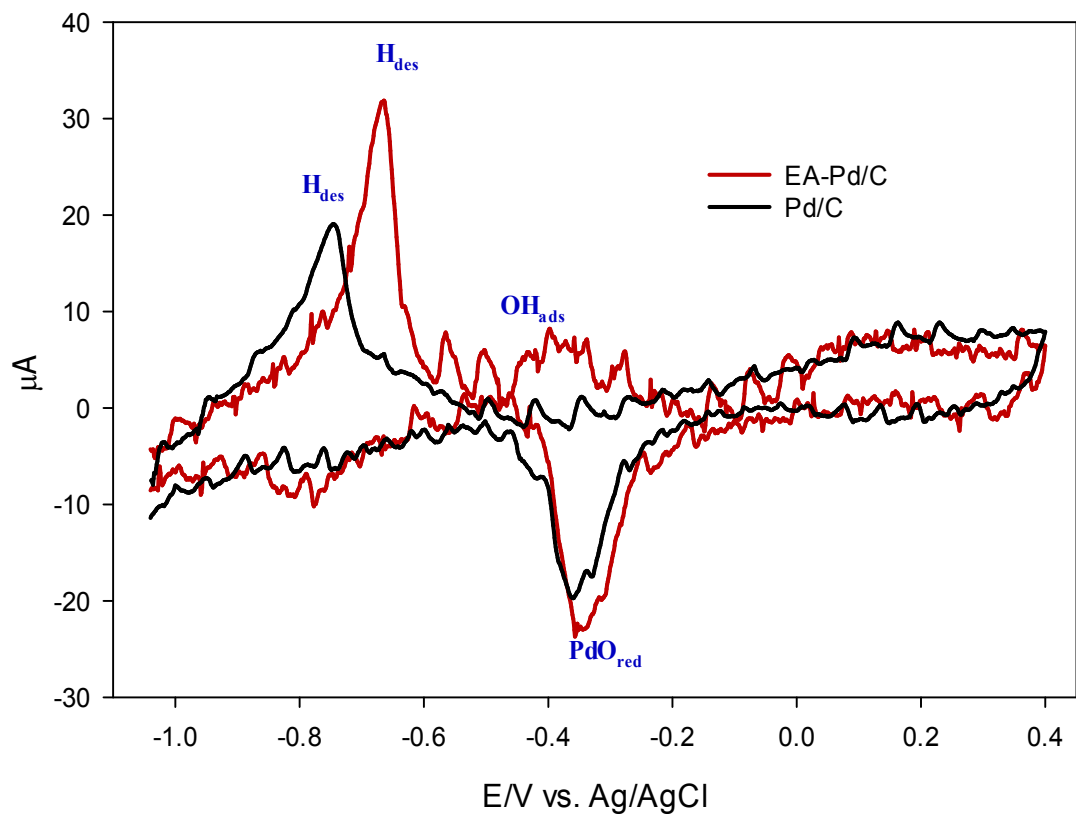

**Fig. S10:** Comparison of CV curves in 1.0 M NaOH solution for the Pd/C, before and after being subjected to EA process (Scan rate 50 mV s<sup>-1</sup>).

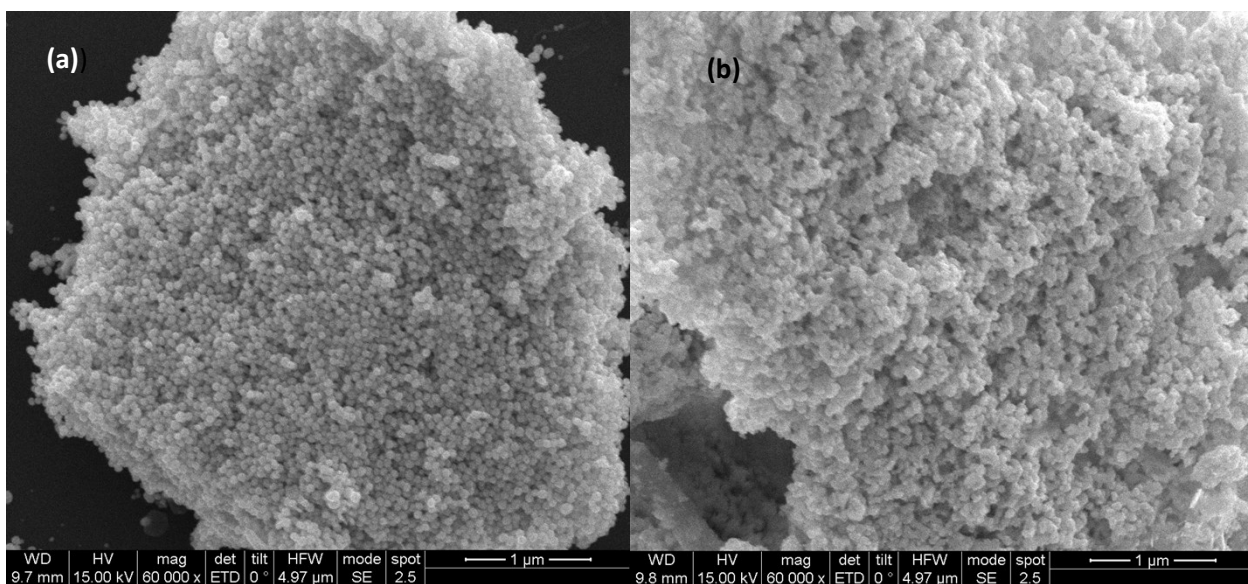

**Fig. S11:** SEM image of (a) AuPd, (b) EA-AuPd.
